# Supplementary material for: Structural basis of unisite catalysis of bacterial F0F1-ATPase
Source: PubMed Central journal article supplement (PMC9896953; doi:10.1093/pnasnexus/pgac116), 2022-07-11
Supplement: pgac116_supplemental_file.pdf [file pgac116_supplemental_file.pdf]

Fig. S1

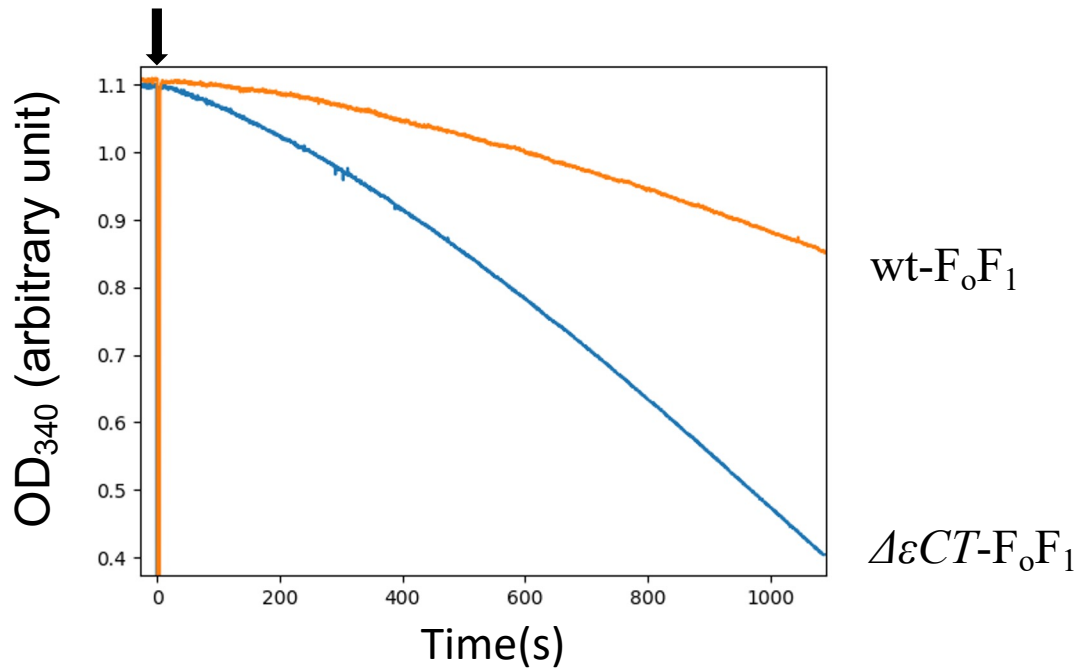

**Figure S1. ATPase activity of wild-type  $F_0F_1$  and  $\Delta\varepsilon CT$ - $F_0F_1$**   
The activities of wild-type  $F_0F_1$  and  $\Delta\varepsilon CT$ - $F_0F_1$  were measured using the enzyme coupling assay described in the Materials and Methods section.

Fig. S2

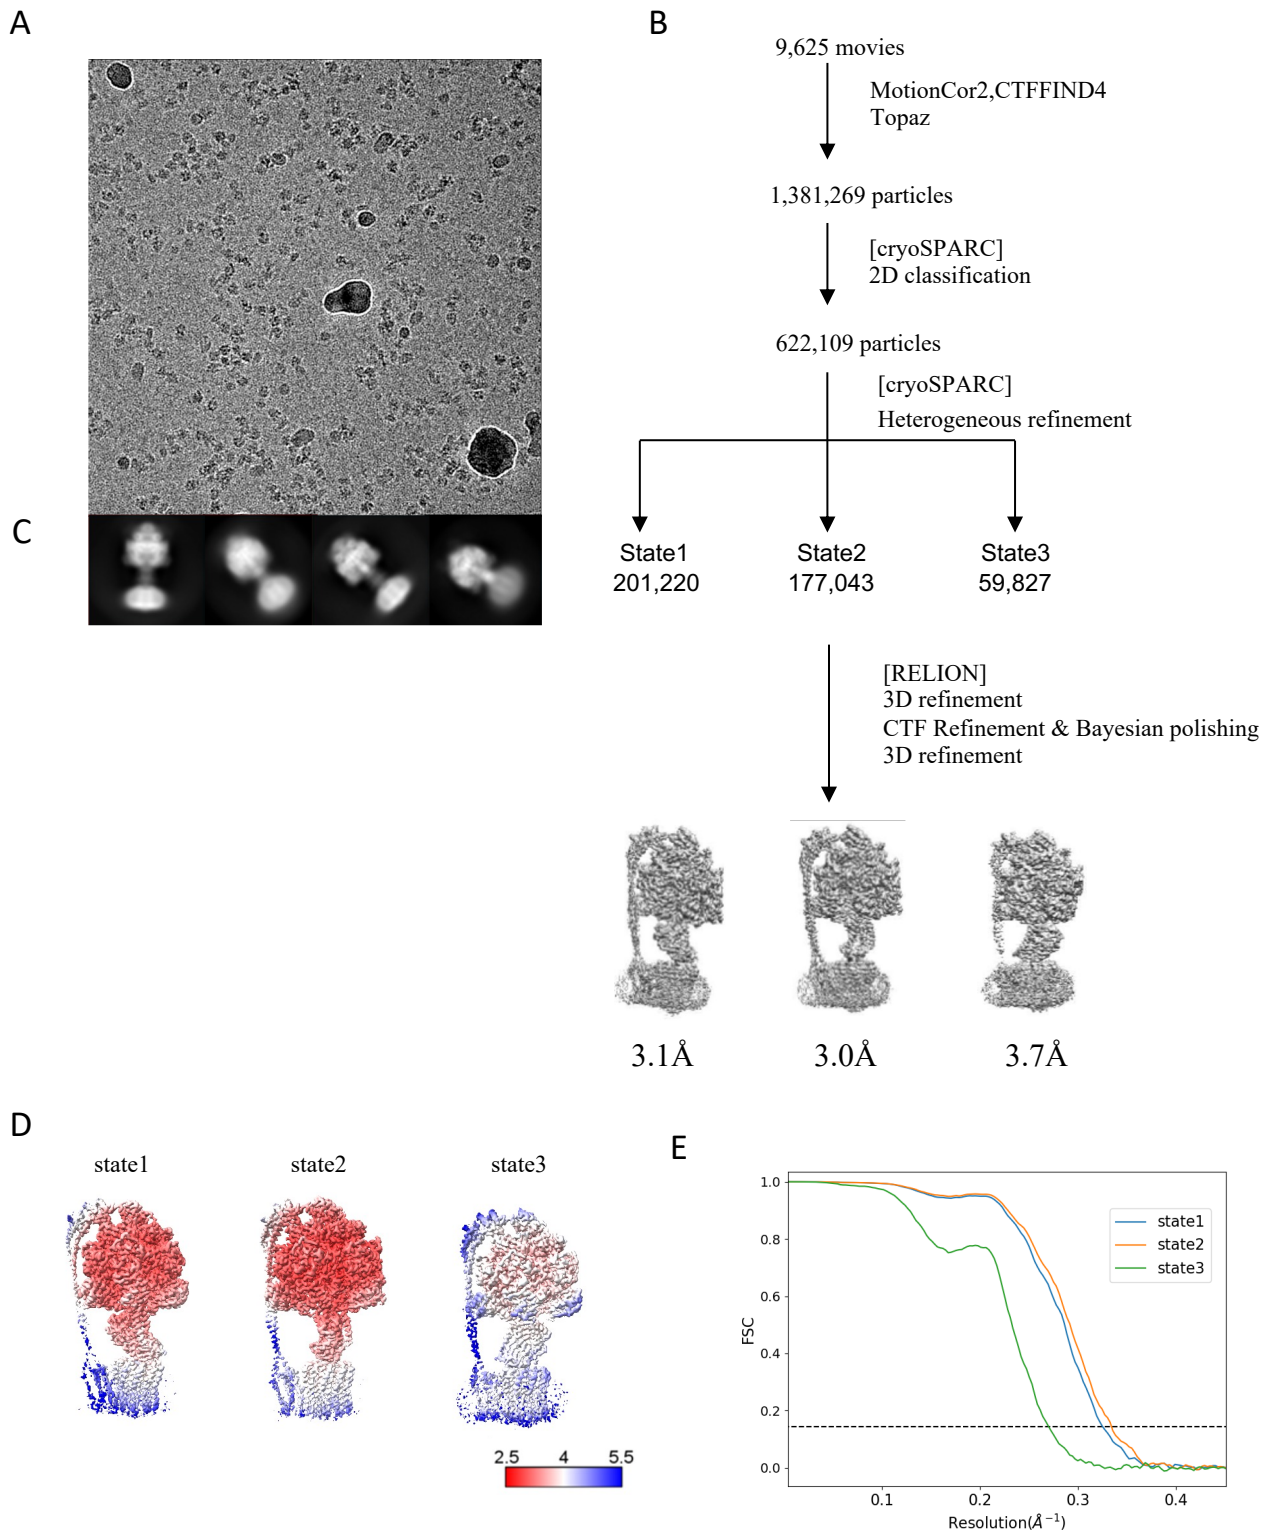

**Figure S2. Image acquisition and reconstitution of the 3D structure of nucleotide-depleted (*ND*) wild-type (*wt*)- $F_0F_1$**

**(A)** Representative motion-corrected and dose-weighted micrographs. **(B)** Workflow for cryo-electron microscopy (cryo-EM) single particle analysis of *ND-wt-F<sub>0</sub>F<sub>1</sub>*. **(C)** 2D class-averaged images. **(D)** Cryo-EM density map. The colors used to represent local resolution are given in the key. **(E)** Fourier shell correlation (FSC) curves for the three rotational states of *wt-ND-F<sub>0</sub>F<sub>1</sub>* using FSC = 0.143 resolution criterion.

Fig. S3

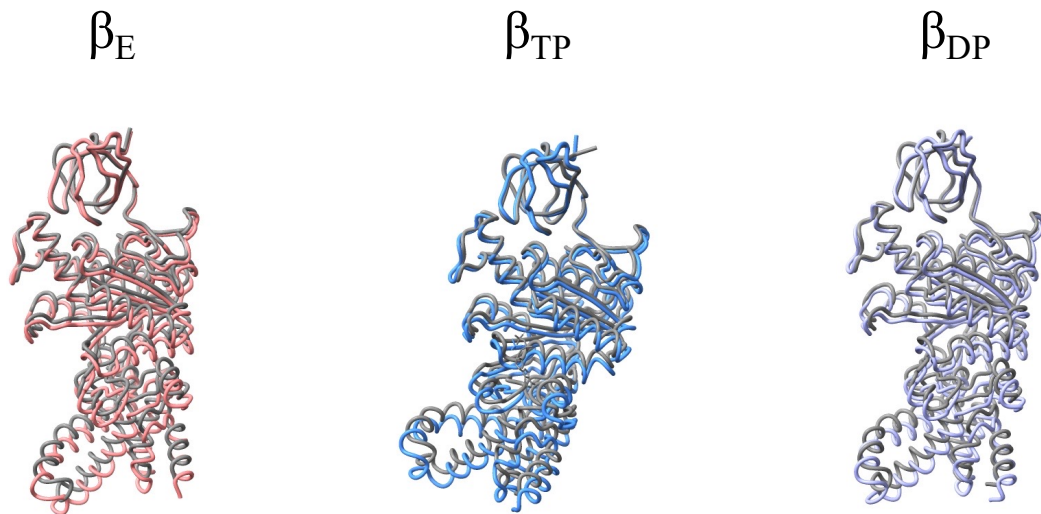

**Figure S3. Structure comparison of *wt-F<sub>0</sub>F<sub>1</sub>* (gray) and *ND-wt-F<sub>0</sub>F<sub>1</sub>* (colored).** The  $\beta_{TP}$ ,  $\beta_{DP}$ , and  $\beta_E$  of *wt-F<sub>0</sub>F<sub>1</sub>* (6N2Y) and *US-ΔεCT-F<sub>0</sub>F<sub>1</sub>* were superimposed in the  $\beta$ -barrel domain (1-80 a .a.), respectively.

Fig. S4

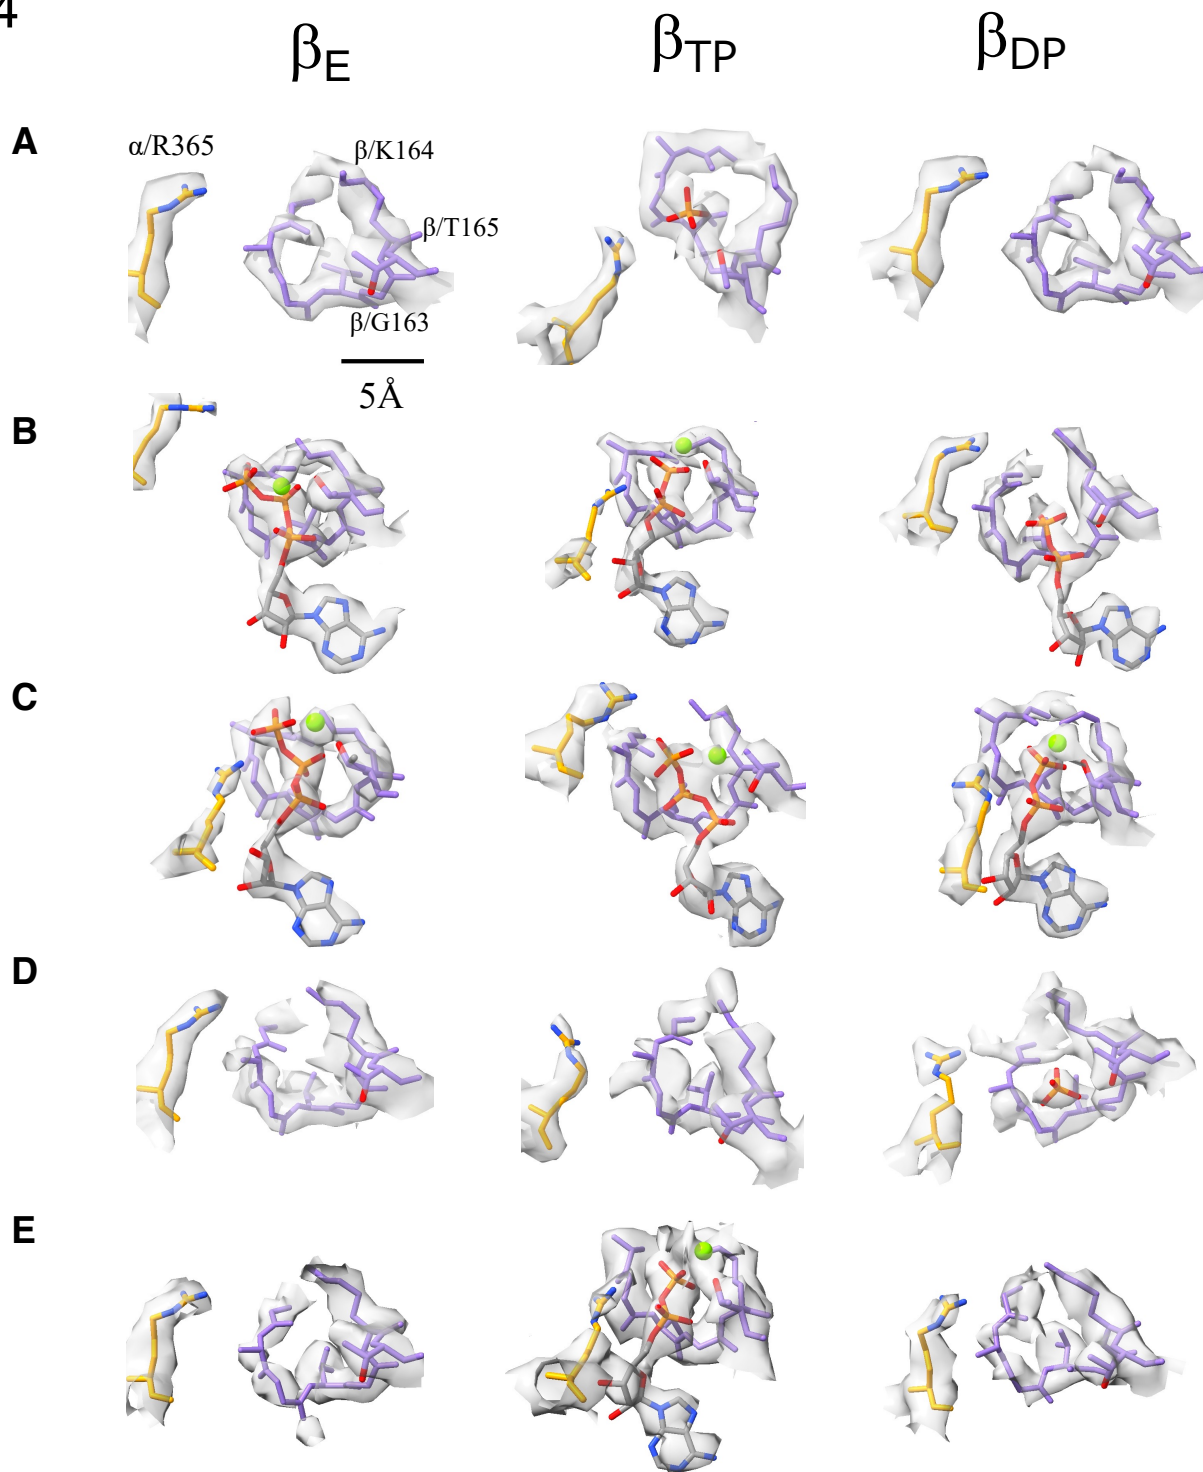

**Figure S4. Structure of catalytic sites of wild-type  $F_0F_1$**

Magnified views of the three catalytic sites ( $\beta_E$ ,  $\beta_{TP}$ , and  $\beta_{DP}$ ) in each structure are shown as follows: **(A)** *ND-wt-F<sub>0</sub>F<sub>1</sub>*, **(B)** *wt-F<sub>0</sub>F<sub>1</sub>*  $\epsilon$  up form with ATP $\gamma$ S, **(C)** *wt-F<sub>0</sub>F<sub>1</sub>*  $\epsilon$  down form with ATP $\gamma$ S, **(D)** *ND- $\Delta$ ACT-F<sub>0</sub>F<sub>1</sub>*, and **(E)** *US- $\Delta$ ACT-F<sub>0</sub>F<sub>1</sub>*. Cryo-electron microscopy maps are represented as semi-transparent structures. Scale bar is 5 Å.

Fig. S5

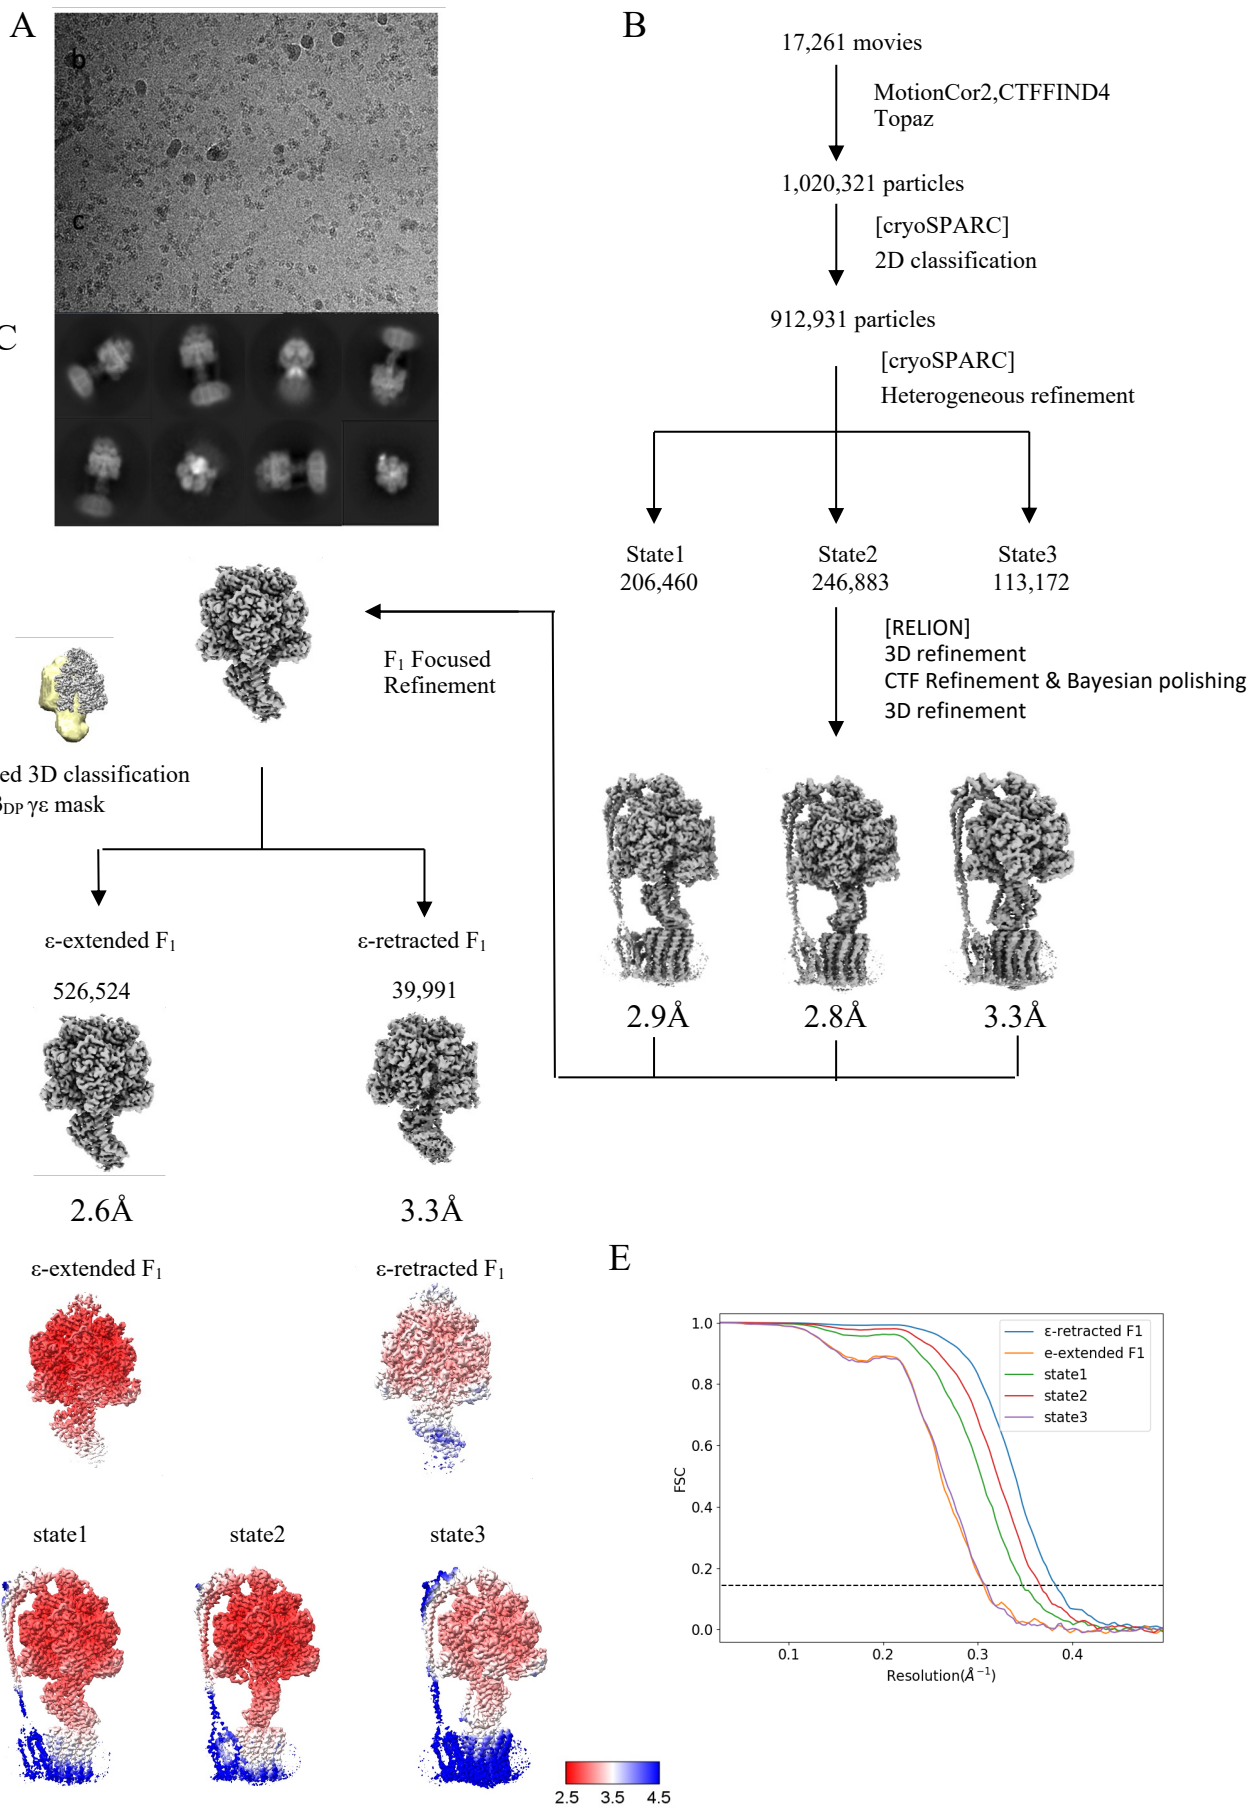

**Figure S5. Image acquisition and reconstitution of the 3D structure of *wt*-F<sub>0</sub>F<sub>1</sub> under ATP $\gamma$ S saturation condition**

**(A)** Micrographs. **(B)** Workflow for cryo-electron microscopy (cryo-EM) single particle analysis under ATP $\gamma$ S saturation condition. EM density maps of three states were combined and the F<sub>1</sub> domain was classified into  $\epsilon$ -extended and  $\epsilon$ -retracted forms. **(C)** 2D class-averaged images. **(D)** Cryo-EM density map of  $\epsilon$ -extended and  $\epsilon$ -retracted F<sub>1</sub> domains. The colors used to represent local resolution are given in the key. **(E)** Fourier shell correlation (FSC) curves for  $\epsilon$ -extended and  $\epsilon$ -retracted F<sub>1</sub> domains using FSC = 0.143 resolution criterion.

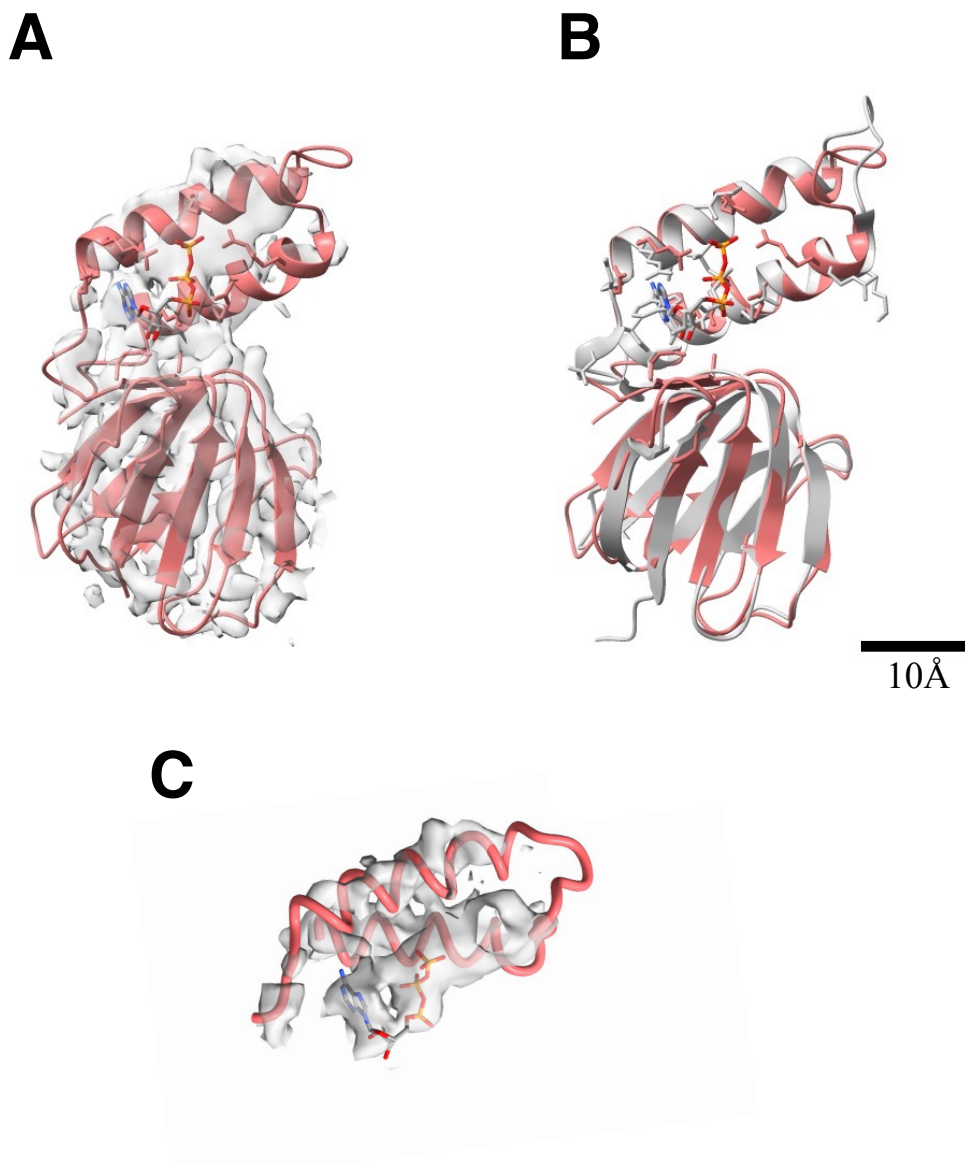

**Figure S6. Structure of down form of  $\epsilon$  subunit with ATP in  $wt-F_0F_1$**   
(A) Density map of  $\epsilon$  subunit in  $F_1$  domain obtained under saturated ATP $\gamma$ S condition. (B) Superposition of the crystal structure of retracted- $\epsilon$  subunit (gray, PDB:2E5Y) and the structure of retracted- $\epsilon$  in  $F_1$  domain obtained under saturated ATP $\gamma$ S condition. (C) Magnified view of ATP binding site of retracted- $\epsilon$  in  $F_1$  domain. ATP was represented as sticks.

Fig. S7

A

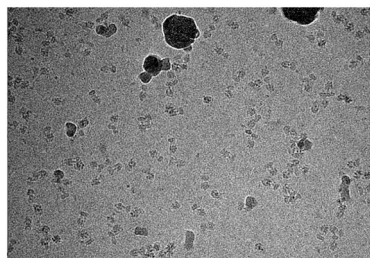

C

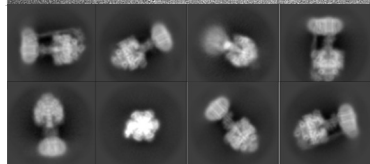

B

7,329 movies  
MotionCor2,CTFFIND4  
Topaz

499,788 particles

[cryoSPARC]  
2D classification

418,497 particles

[cryoSPARC]  
Heterogeneous refinement

state1<sup>ND</sup>

state1<sup>US</sup>

state1<sup>US'</sup>

state2<sup>ND</sup>

state2<sup>ND'</sup>

state2<sup>US</sup>

state3<sup>US</sup>

34,672

73,935

34,829

52,165

12,644

84,255

28,776

[RELION]  
3D refinement  
CTF Refinement & Bayesian Polishing  
3D refinement

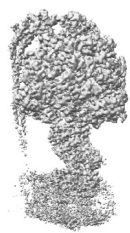

3.6Å

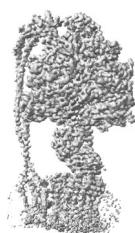

3.2Å

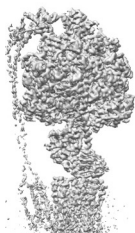

3.4Å

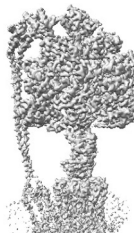

3.4Å

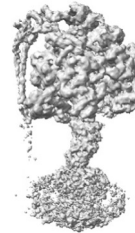

4.5Å

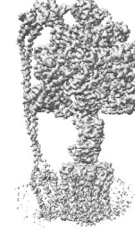

3.2Å

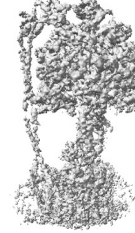

4Å

F<sub>1</sub> focused refinement

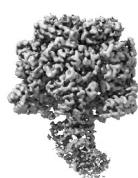

3.4Å

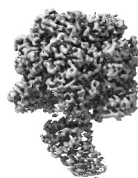

3.0Å

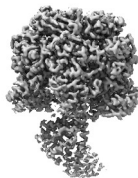

3.2Å

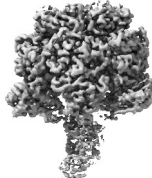

3.3Å

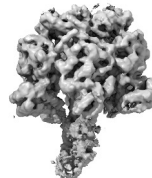

4.5Å

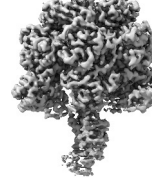

3.1Å

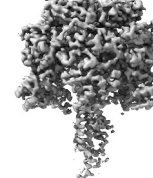

3.8Å



D

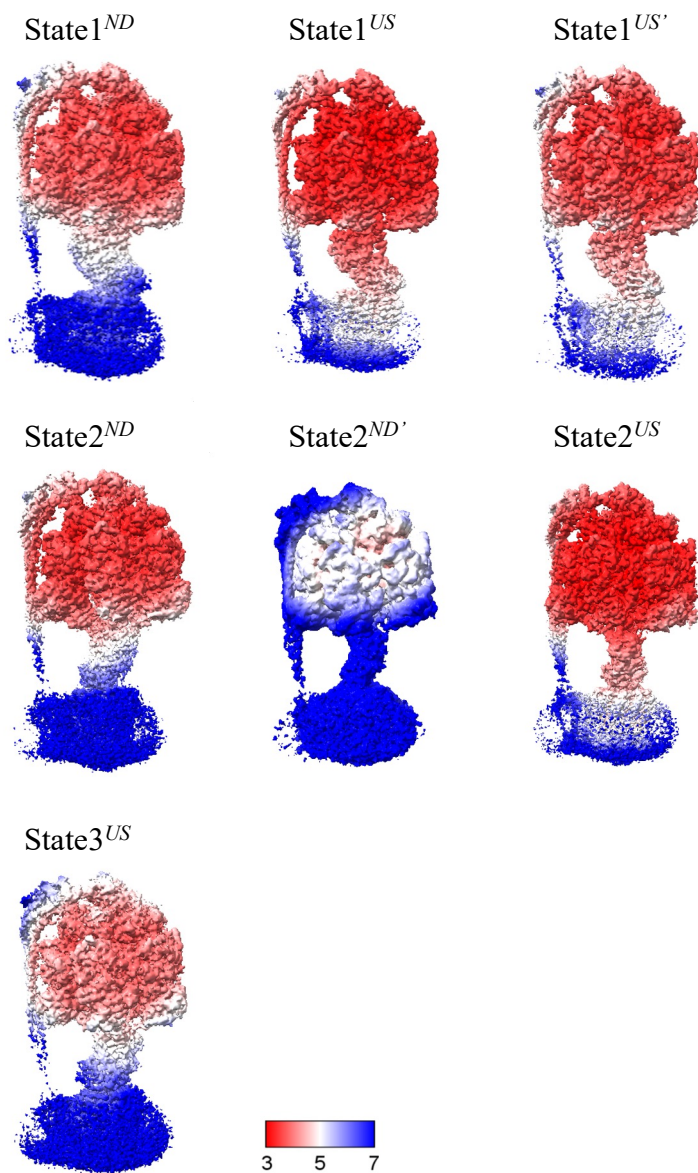

F

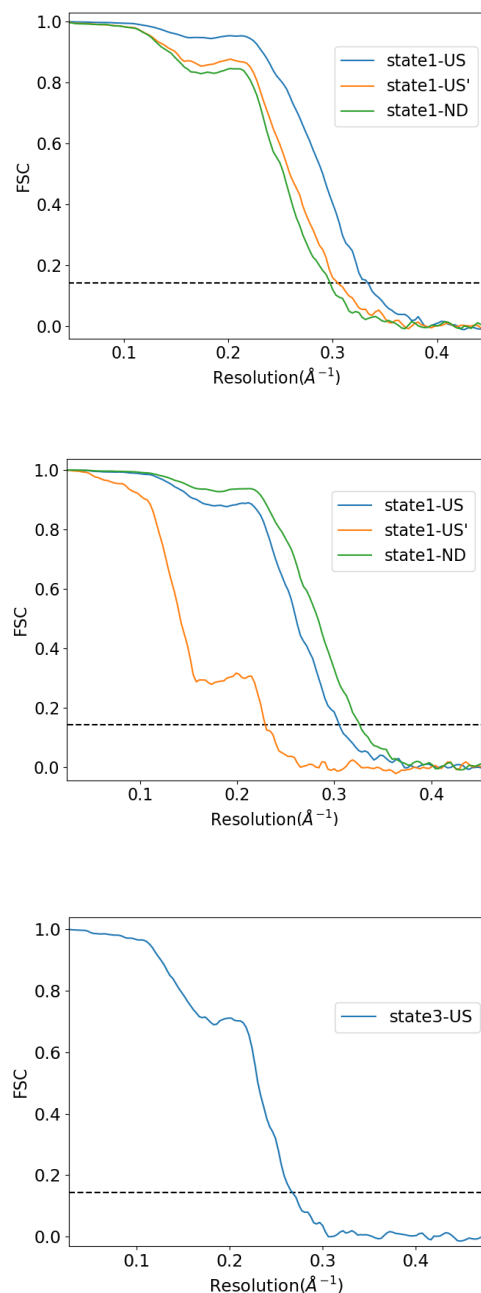

**Figure S7. Image acquisition and reconstitution of the 3D structures of nucleotide-depleted (ND)- $\Delta\epsilon CT$ -F<sub>0</sub>F<sub>1</sub> and Uni-Site (US)- $\Delta\epsilon CT$ -F<sub>0</sub>F<sub>1</sub>.**

(A) Micrographs. (B) Workflow for cryo-electron microscopy (cryo-EM) single particle analysis under unisite conditions. (C) 2D class-averaged images. (D) Cryo-EM density map of ND- $\Delta\epsilon CT$ -F<sub>0</sub>F<sub>1</sub> and US- $\Delta\epsilon CT$ -F<sub>0</sub>F<sub>1</sub>. The colors used to represent local resolution are given in the key. (E) Fourier shell correlation (FSC) curves for each of the three rotational states of F<sub>0</sub>F<sub>1</sub> obtained from the unisite condition using FSC = 0.143 for resolution criterion.

Fig. S8

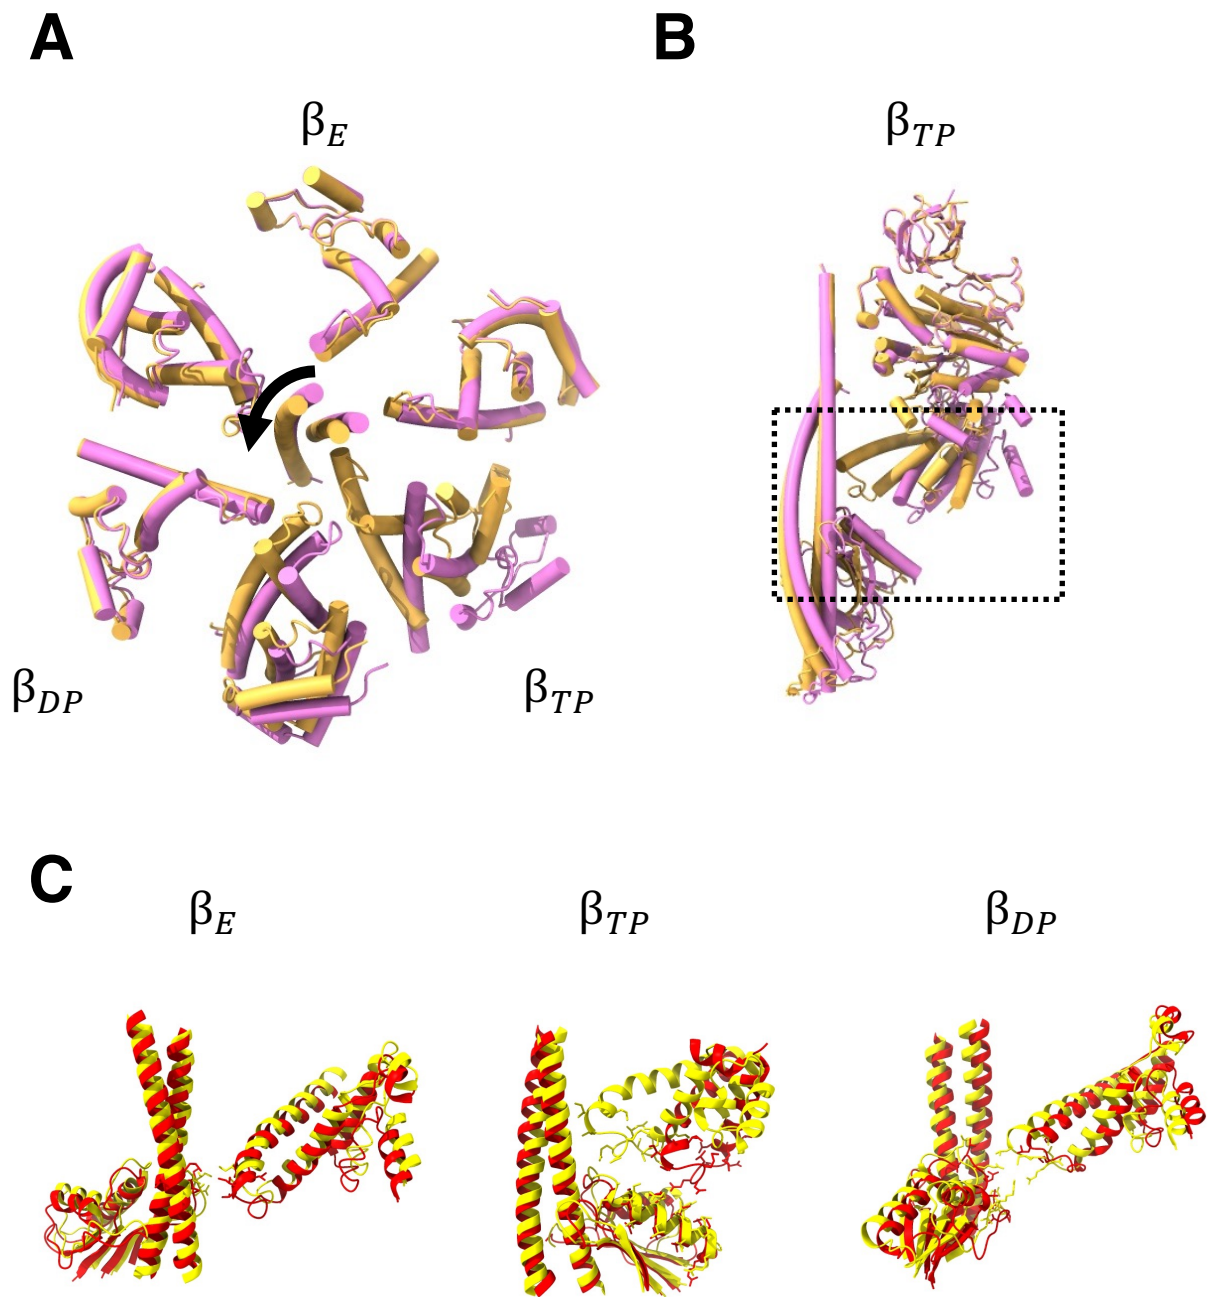

**Figure S8.** Structure comparison of *US-ΔεCT-F<sub>0</sub>F<sub>1</sub>* (orange) and *ND-wt-F<sub>0</sub>F<sub>1</sub>* (pink). (A) slice view of C terminal F<sub>1</sub> domain. (B) Side view of  $\beta_{TP}$  and  $\gamma$  subunit. All subunits were represented as cylinders.

Fig. S9

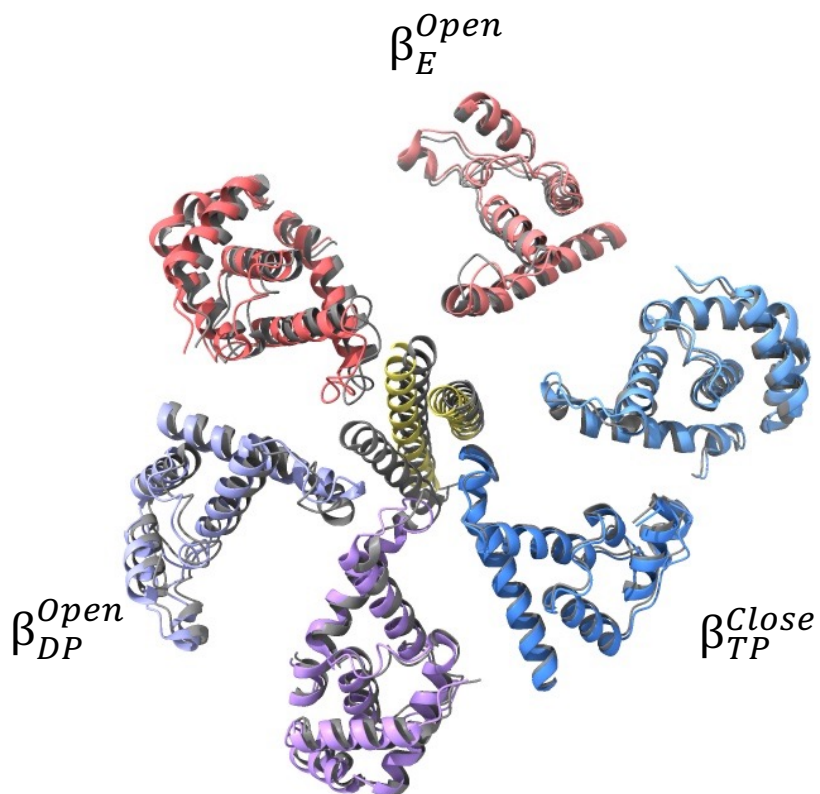

**Figure S9.** Structure comparison of *US- $\Delta\epsilon$ CT-F<sub>0</sub>F<sub>1</sub>* (colored) and *ND-wt-F<sub>0</sub>F<sub>1</sub>* (gray) in C termini domain of both  $\alpha$  and  $\beta$  subunits, and  $\gamma$  subunit.

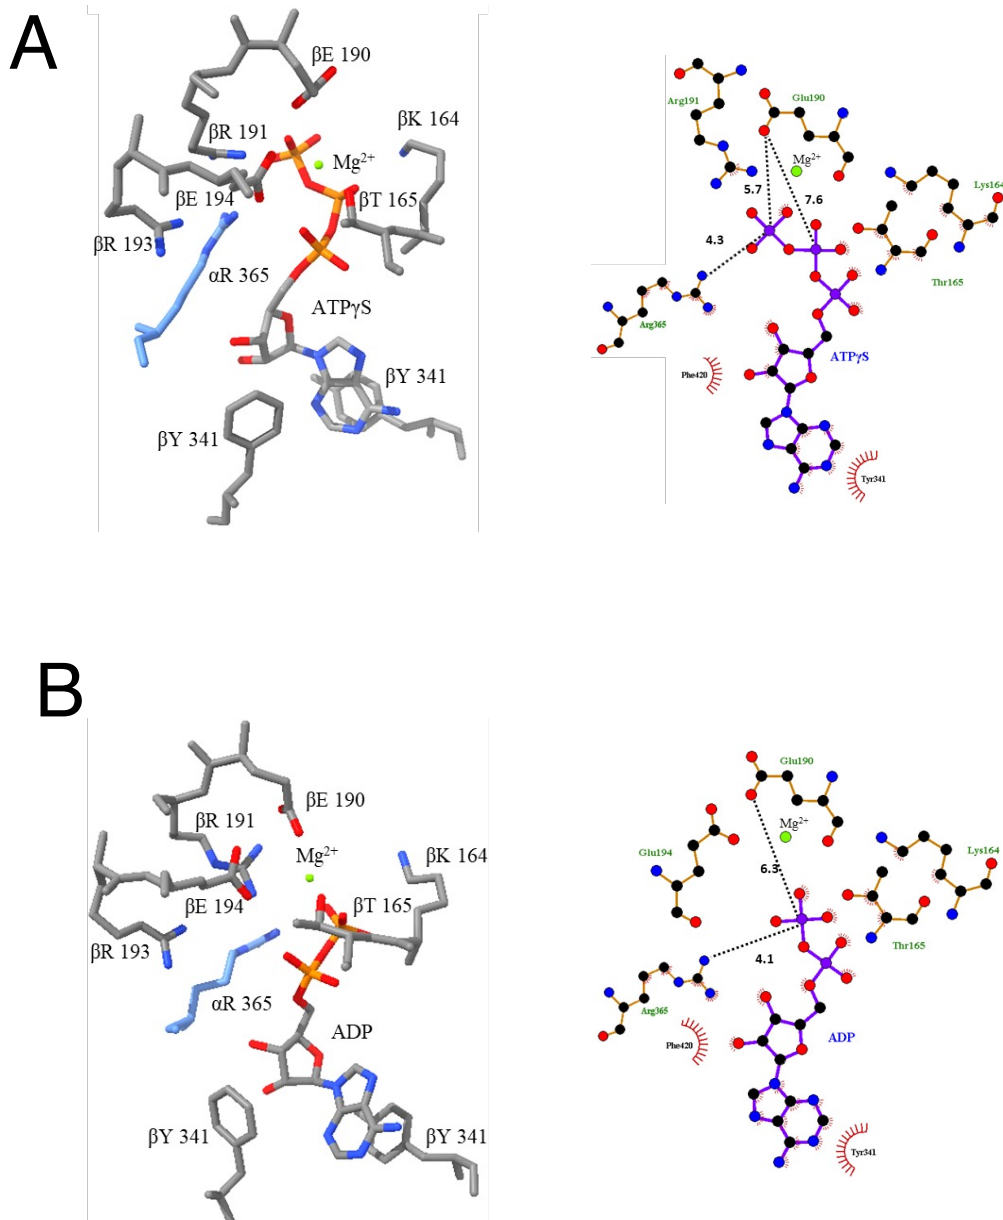

**Figure S10. Coordination of nucleotides in the binding sites of wt-F<sub>0</sub>F<sub>1</sub> ε-retracted form with ATPγS.** *Left panels;* binding sites of β<sub>TP</sub> (**A**) and β<sub>DP</sub> (**B**) in wt-F<sub>0</sub>F<sub>1</sub> ε-retracted form with ATPγS (drawn with colored atoms and bonds and blue main chain) *Right panels;* Schematic representations of the coordination of ATP group bound to the side chains, respectively. The distances between the atoms are shown in dotted lines. All distances are in Å. Two-dimensional diagram generated by Ligplot.

**Supplementary Table1. ATPase activity of *wt*-F<sub>0</sub>F<sub>1</sub> and  $\Delta\varepsilon CT$  - F<sub>0</sub>F<sub>1</sub> at the indicated time after initiation of reaction.** The activities of wild-type F<sub>0</sub>F<sub>1</sub> and  $\Delta\varepsilon CT$ -F<sub>0</sub>F<sub>1</sub> were measured using the enzyme coupling assay described in the Materials and Methods section.

| time                                                  | 30 s               | 600 s               | 1000 s              |
|-------------------------------------------------------|--------------------|---------------------|---------------------|
| <i>wt</i> -F <sub>0</sub> F <sub>1</sub>              | 11 s <sup>-1</sup> | 41 s <sup>-1</sup>  | 51 s <sup>-1</sup>  |
| $\Delta\varepsilon CT$ -F <sub>0</sub> F <sub>1</sub> | 49 s <sup>-1</sup> | 107 s <sup>-1</sup> | 130 s <sup>-1</sup> |

**Supplementary Table 2. Cryo-EM data collection, refinement and validation statistics for *wt-ND* F<sub>0</sub>F<sub>1</sub>.**

|                                              | state1                        | state2                        | state3                        |
|----------------------------------------------|-------------------------------|-------------------------------|-------------------------------|
|                                              | F <sub>0</sub> F <sub>1</sub> | F <sub>0</sub> F <sub>1</sub> | F <sub>0</sub> F <sub>1</sub> |
| EMDB ID                                      | 33251                         | 33252                         | 33253                         |
| PDB ID                                       | 7XKH                          |                               |                               |
| <b>Data collection and processing</b>        |                               |                               |                               |
| Magnification                                | 50,000                        | 50,000                        | 50,000                        |
| Microscope                                   | CRYOARM300                    | CRYOARM300                    | CRYOARM300                    |
| Voltage(kV)                                  | 300                           | 300                           | 300                           |
| Total dose (e <sup>-</sup> /Å <sup>2</sup> ) | 50                            | 50                            | 50                            |
| Pixel size(Å/pix)                            | 1.01                          | 1.01                          | 1.01                          |
| Defocus range(μm)                            | -0.8 to -2.0                  | -0.8 to -2.0                  | -0.8 to -2.0                  |
| symmetry imposed                             | C1                            | C1                            | C1                            |
| Initial particle                             | 1,381,269                     | 1,381,269                     | 1,381,269                     |
| Final Particle                               | 201,220                       | 177,043                       | 59,827                        |
| Map resolution(Å)                            | 3.1                           | 3                             | 3.7                           |
| FSC threshold                                | 0.143                         | 0.143                         | 0.143                         |
| <b>Refinement</b>                            |                               |                               |                               |
| Initial model used                           | This study                    | This study                    | This study                    |
| Model resolution                             | 3.1                           |                               |                               |
| FSC threshold                                | 0.5                           | 0.5                           | 0.5                           |
| <b>Model composition</b>                     |                               |                               |                               |
| Nonhydrogen atoms                            | 25,563                        |                               |                               |
| Protein residues                             | 3,317                         |                               |                               |
| Ligands                                      | Pi                            |                               |                               |
| <b>R.m.s deviations</b>                      |                               |                               |                               |
| Bond length (Å)                              | 0.002                         |                               |                               |
| Bond Angles (°)                              | 0.443                         |                               |                               |
| <b>Validation</b>                            |                               |                               |                               |
| MolProbity score                             | 1.04                          |                               |                               |
| EMRinger score                               | 2.56                          |                               |                               |
| Clashscore                                   | 2.56                          |                               |                               |
| Rotamer outlier (%)                          | 0                             |                               |                               |
| CaBALM outlier (%)                           | 1.67                          |                               |                               |
| <b>Ramachandran plot</b>                     |                               |                               |                               |
| Favored (%)                                  | 98.36                         |                               |                               |
| Allowed (%)                                  | 1.64                          |                               |                               |
| Disallowed (%)                               | 0                             |                               |                               |

**Supplementary Table 3. Cryo-EM data collection, refinement and validation statistics for *wt*-F<sub>0</sub>F<sub>1</sub> obtained under 4 mM ATP $\gamma$ S condition.**

|                                              | $\epsilon$ -extended  | $\epsilon$ -retracted | state1                        | state2                        | state3                        |
|----------------------------------------------|-----------------------|-----------------------|-------------------------------|-------------------------------|-------------------------------|
|                                              | F <sub>1</sub> domain | F <sub>1</sub> domain | F <sub>0</sub> F <sub>1</sub> | F <sub>0</sub> F <sub>1</sub> | F <sub>0</sub> F <sub>1</sub> |
| EMDB ID                                      | 33264                 | 33265                 | 33266                         | 33267                         | 33268                         |
| PDB ID                                       | 7XKQ                  | 7XKR                  |                               |                               |                               |
| <b>Data collection and processing</b>        |                       |                       |                               |                               |                               |
| Magnification                                | 50,000                | 81,000                | 81,000                        | 81,000                        | 81,000                        |
| Microscope                                   | Titan Krios           | Titan Krios           | Titan Krios                   | Titan Krios                   | Titan Krios                   |
| Voltage(kV)                                  | 300                   | 300                   | 300                           | 300                           | 300                           |
| Total dose (e <sup>-</sup> /Å <sup>2</sup> ) | 50                    | 50                    | 50                            | 50                            | 50                            |
| Pixel size(Å/pix)                            | 0.88                  | 0.88                  | 0.88                          | 0.88                          | 0.88                          |
| Defocus range( $\mu$ m)                      | -0.8 to -2.0          | -0.8 to -2.0          | -0.8 to -2.0                  | -0.8 to -2.0                  | -0.8 to -2.0                  |
| symmetry imposed                             | C1                    | C1                    | C1                            | C1                            | C1                            |
| Initial particle                             | 1,020,321             | 1,020,321             | 1,020,321                     | 1,020,321                     | 1,020,321                     |
| Final Particle                               | 526,524               | 39,991                | 206,460                       | 246,883                       | 113,172                       |
| Map resolution(Å)                            | 2.6                   | 3.3                   | 2.9                           | 2.8                           | 3.3                           |
| FSC threshold                                | 0.143                 | 0.143                 | 0.143                         | 0.143                         | 0.143                         |
| <b>Refinement</b>                            |                       |                       |                               |                               |                               |
| Initial model used                           | This study            | This study            | This study                    | This study                    | This study                    |
| Model resolution                             | 2.7                   | 3.5                   |                               |                               |                               |
| FSC threshold                                | 0.5                   | 0.5                   | 0.5                           | 0.5                           | 0.5                           |
| <b>Model composition</b>                     |                       |                       |                               |                               |                               |
| Nonhydrogen atoms                            | 25,254                | 25,306                |                               |                               |                               |
| Protein residues                             | 3,257                 | 3,259                 |                               |                               |                               |
| Ligands                                      | 5MG, 4ATP,<br>2ADP    | 6MG, 6ATP,<br>ADP     |                               |                               |                               |
| <b>R.m.s deviations</b>                      |                       |                       |                               |                               |                               |
| Bond length (Å)                              | 0.003                 | 0.003                 |                               |                               |                               |
| Bond Angles (°)                              | 0.545                 | 0.507                 |                               |                               |                               |
| <b>Validation</b>                            |                       |                       |                               |                               |                               |
| MolProbity score                             | 1.1                   | 1.27                  |                               |                               |                               |
| EMRinger score                               | 4.29                  | 3.31                  |                               |                               |                               |
| Clashscore                                   | 3.13                  | 4.92                  |                               |                               |                               |
| Rotamer outlier (%)                          | 0                     | 0                     |                               |                               |                               |
| CaBALM outlier (%)                           | 1.3                   | 1.85                  |                               |                               |                               |
| <b>Ramachandran plot</b>                     |                       |                       |                               |                               |                               |
| Favored (%)                                  | 98.36                 | 97.96                 |                               |                               |                               |
| Allowed (%)                                  | 1.64                  | 2.01                  |                               |                               |                               |
| Disallowed (%)                               | 0                     | 0                     |                               |                               |                               |

**Supplementary Table 4. Cryo-EM data collection, refinement and validation statistics for  $\Delta CT-F_0F_1$  obtained under unisite.**

|                                              | state1 ND                     |                | state1 US                     |                | state1 US'                    |                |
|----------------------------------------------|-------------------------------|----------------|-------------------------------|----------------|-------------------------------|----------------|
|                                              | F <sub>0</sub> F <sub>1</sub> | F <sub>1</sub> | F <sub>0</sub> F <sub>1</sub> | F <sub>1</sub> | F <sub>0</sub> F <sub>1</sub> | F <sub>1</sub> |
| EMDB ID                                      | 33277                         | 33258          | 33278                         | 33259          | 33279                         | 33260          |
| PDB ID                                       |                               | 7XKO           |                               | 7XKP           |                               |                |
| <b>Data collection and processing</b>        |                               |                |                               |                |                               |                |
| Magnification                                | 81,000                        | 81,000         | 81,000                        | 81,000         | 81,000                        | 81,000         |
| Microscope                                   | Titan Krios                   | Titan Krios    | Titan Krios                   | Titan Krios    | Titan Krios                   | Titan Krios    |
| Voltage(kV)                                  | 300                           | 300            | 300                           | 300            | 300                           | 300            |
| Total dose (e <sup>-</sup> /Å <sup>2</sup> ) | 60                            | 60             | 60                            | 60             | 60                            | 60             |
| Pixel size(Å/pix)                            | 0.88                          | 0.88           | 0.88                          | 0.88           | 0.88                          | 0.88           |
| Defocus range(μm)                            | -0.8 to -2.0                  | -0.8 to -2.0   | -0.8 to -2.0                  | -0.8 to -2.0   | -0.8 to -2.0                  | -0.8 to -2.0   |
| symmetry imposed                             | C1                            | C1             | C1                            | C1             | C1                            | C1             |
| Initial particle                             | 499,788                       | 499,788        | 499,788                       | 499,788        | 499,788                       | 499,788        |
| Final Particle                               | 34,672                        | 34,672         | 73,935                        | 73,935         | 34,829                        | 34,829         |
| Map resolution(Å)                            | 3.6                           | 3.4            | 3.2                           | 3              | 3.4                           | 3.2            |
| FSC threshold                                | 0.143                         | 0.143          | 0.143                         | 0.143          | 0.143                         | 0.143          |
| <b>Refinement</b>                            |                               |                |                               |                |                               |                |
| Initial model used                           | This study                    | This study     | This study                    | This study     | This study                    | This study     |
| Model resolution                             |                               | 3.5            |                               |                |                               |                |
| FSC threshold                                | 0.5                           | 0.5            | 0.5                           | 0.5            | 0.5                           | 0.5            |
| <b>Model composition</b>                     |                               |                |                               |                |                               |                |
| Nonhydrogen atoms                            |                               | 24,070         |                               | 24,594         |                               |                |
| Protein residues                             |                               | 3,127          |                               | 3,188          |                               |                |
| Ligands                                      |                               | Pi             |                               | ATP, MG        |                               |                |
| <b>R.m.s deviations</b>                      |                               |                |                               |                |                               |                |
| Bond length (Å)                              |                               | 0.003          |                               | 0.002          |                               |                |
| Bond Angles (°)                              |                               | 0.49           |                               | 0.48           |                               |                |
| <b>Validation</b>                            |                               |                |                               |                |                               |                |
| MolProbity score                             |                               | 1.47           |                               | 1.25           |                               |                |
| EMRinger score                               |                               | 2.61           |                               | 3.37           |                               |                |
| Clashscore                                   |                               | 5.68           |                               | 3.86           |                               |                |
| Rotamer outlier (%)                          |                               | 0              |                               | 0              |                               |                |
| CaBALM outlier (%)                           |                               | 1.9            |                               | 1.87           |                               |                |
| <b>Ramachandran plot</b>                     |                               |                |                               |                |                               |                |
| Favored (%)                                  |                               | 97.08          |                               | 97.67          |                               |                |
| Allowed (%)                                  |                               | 2.92           |                               | 2.33           |                               |                |
| Disallowed (%)                               |                               | 0              |                               | 0              |                               |                |
